# Supplementary figures and images for: Planar cell polarity defects and defective Vangl2 trafficking in mutants for the COPII gene Sec24b
Source: Oxford University Press journal article supplement (doi:10.1242/dev.041434), 2010-03-09

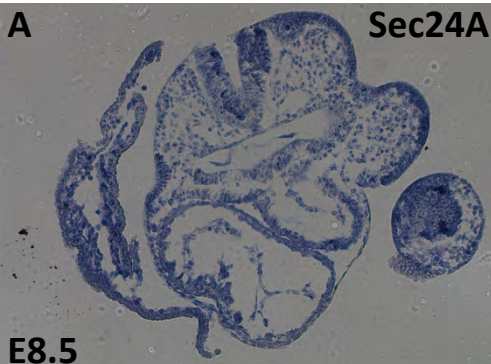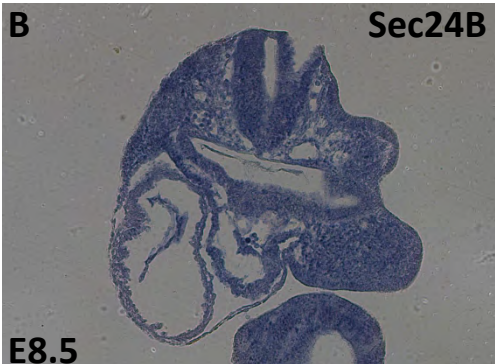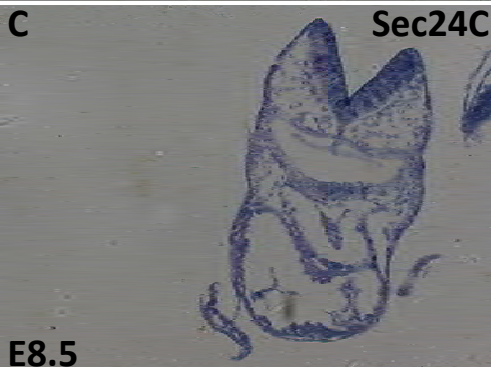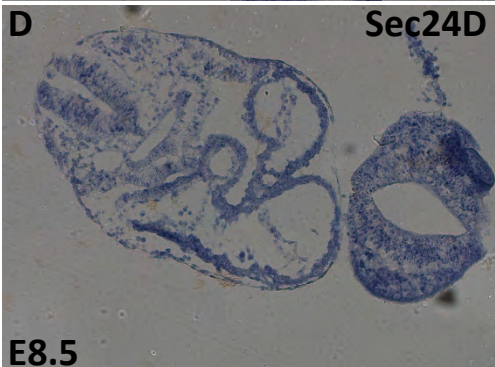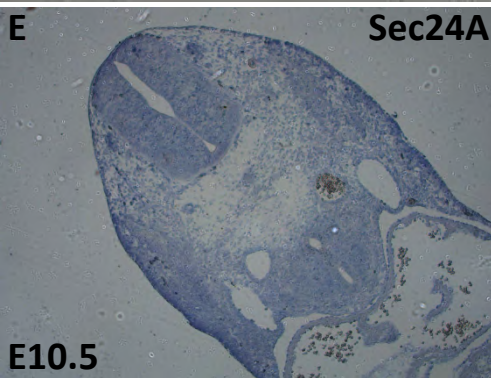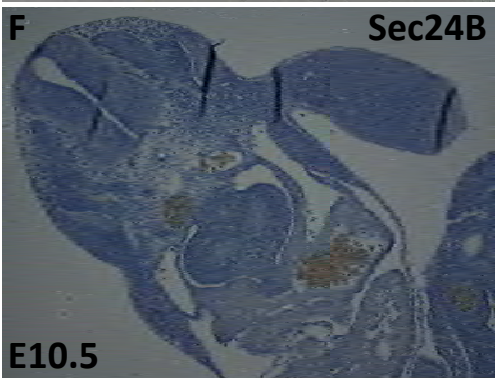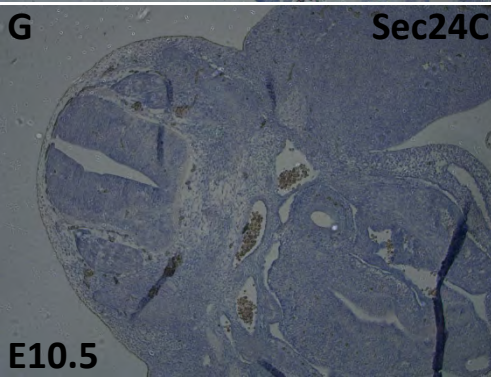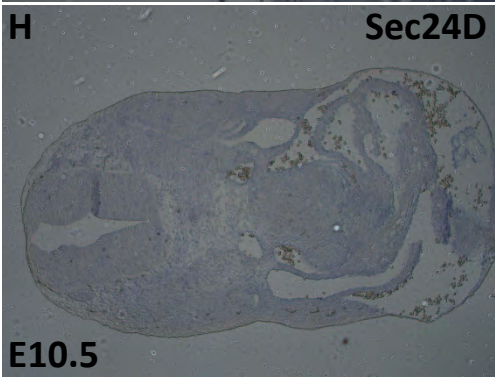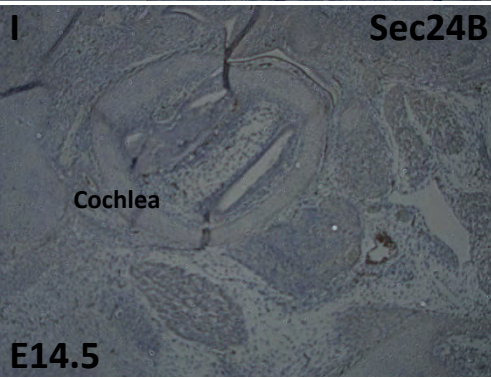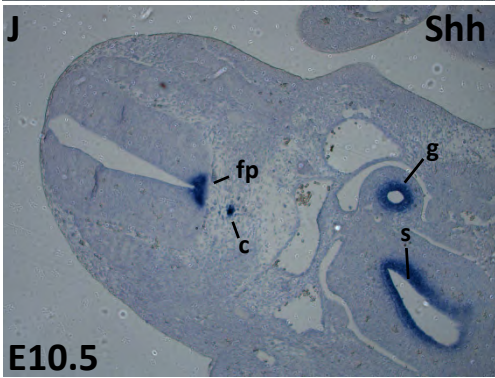

Supplement: dev041434-sup-041434figs1.pdf [file dev041434-sup-041434figs1.pdf]

Percentage of hair cells misoriented between 30° and 330° in the base (n=4)

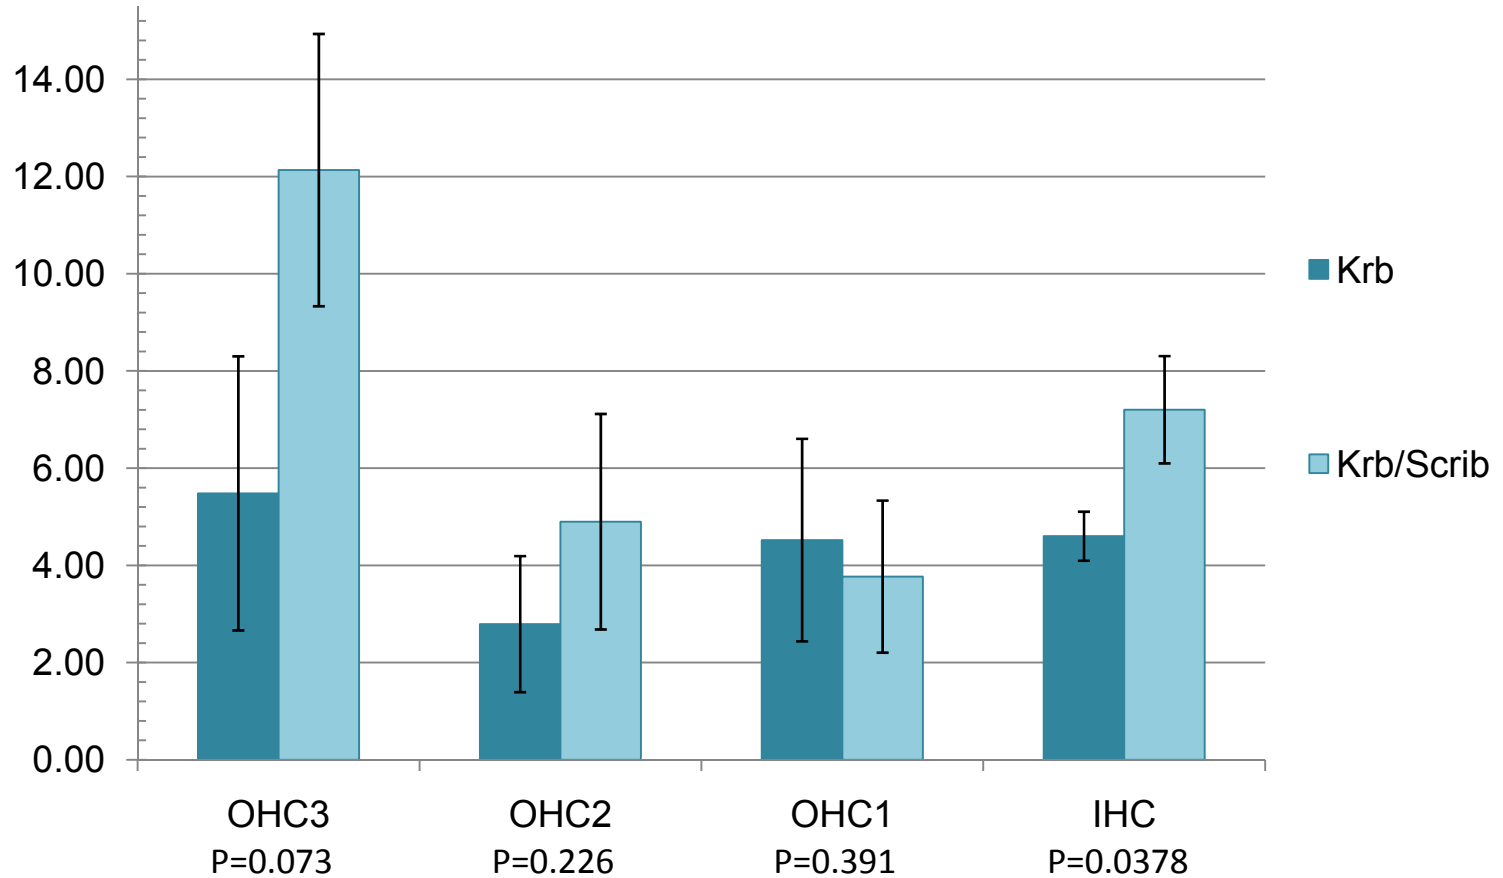

Supplement: dev041434-sup-041434figs2.pdf [file dev041434-sup-041434figs2.pdf]

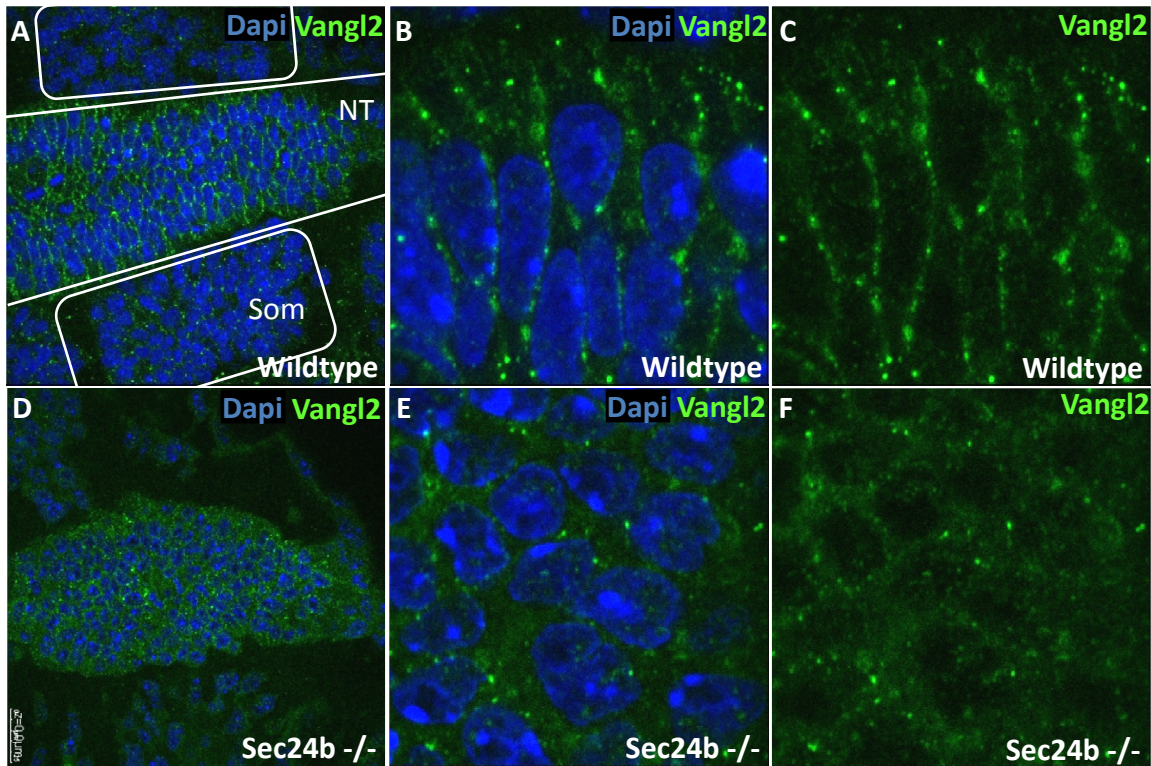

Supplement: dev041434-sup-041434figs3.pdf [file dev041434-sup-041434figs3.pdf]

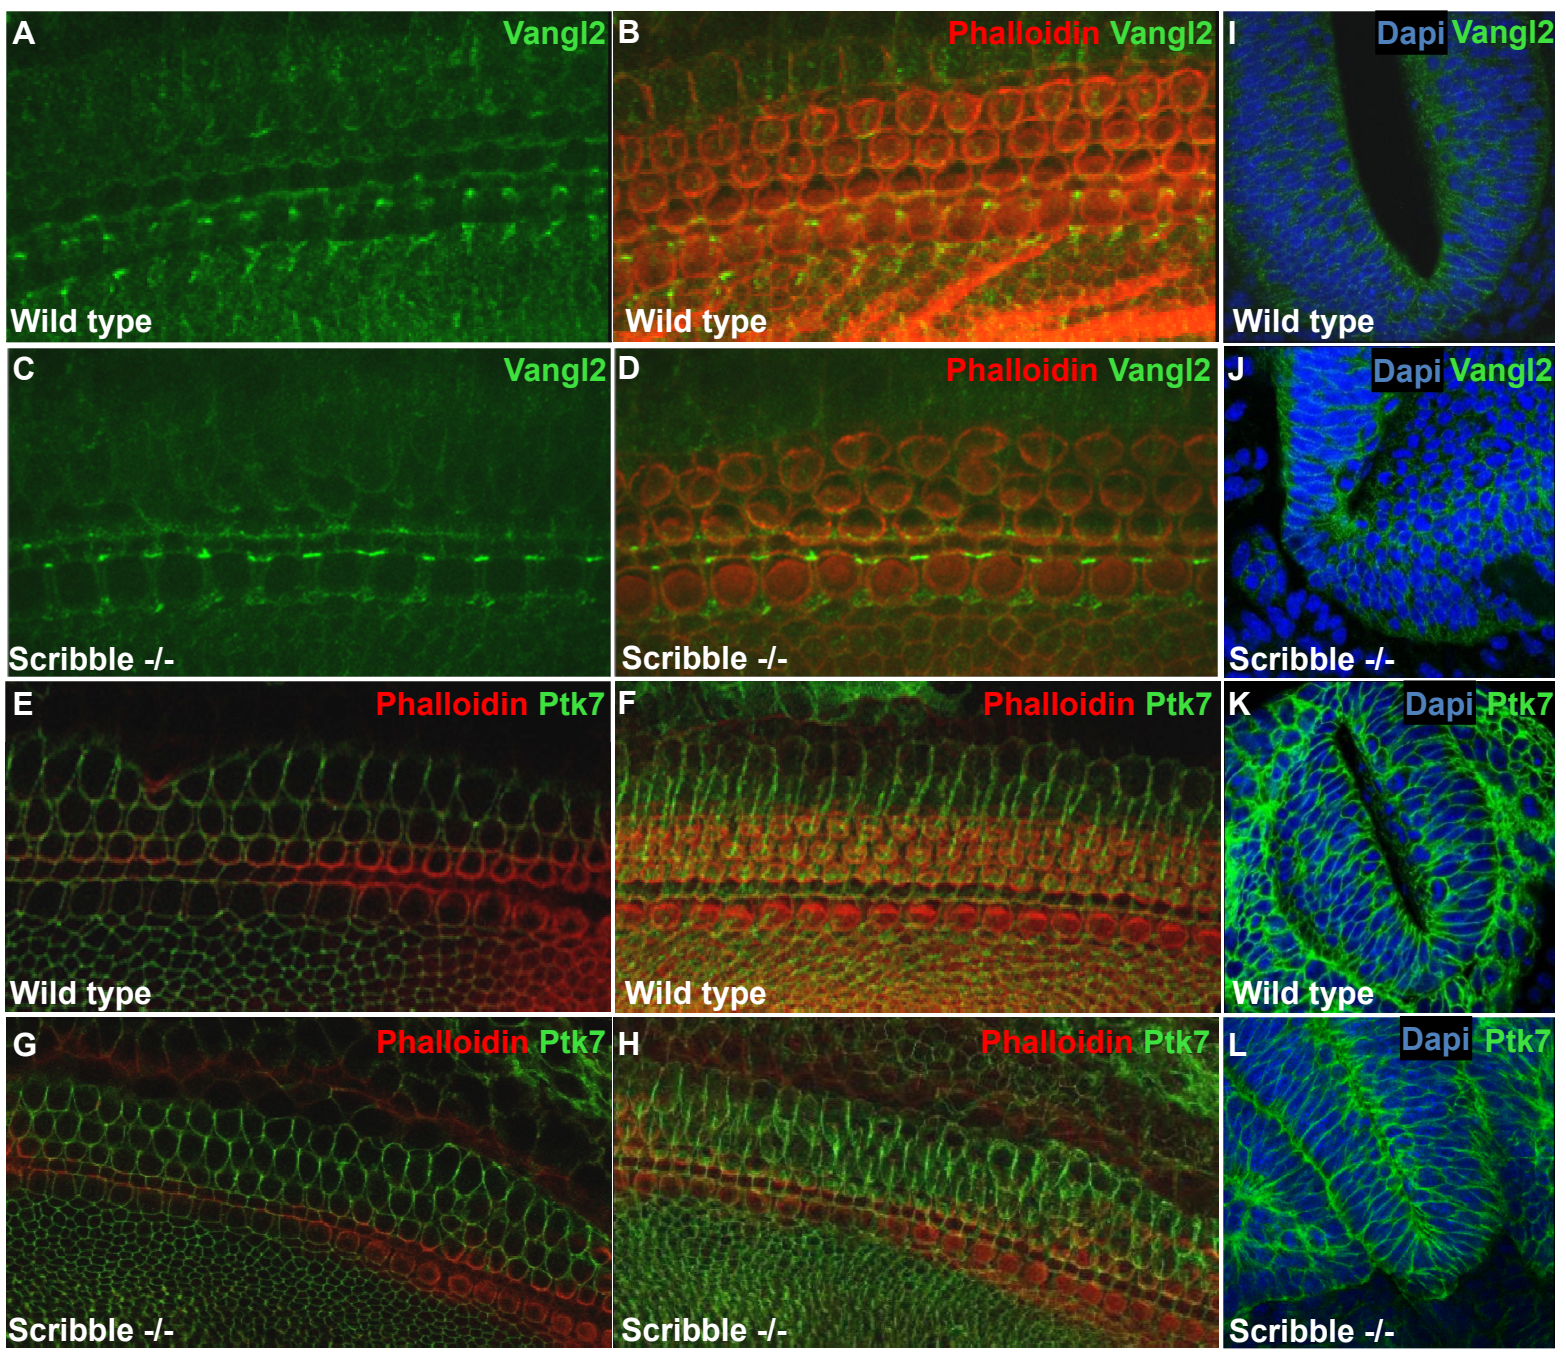

Supplement: dev041434-sup-041434figs4.pdf [file dev041434-sup-041434figs4.pdf]

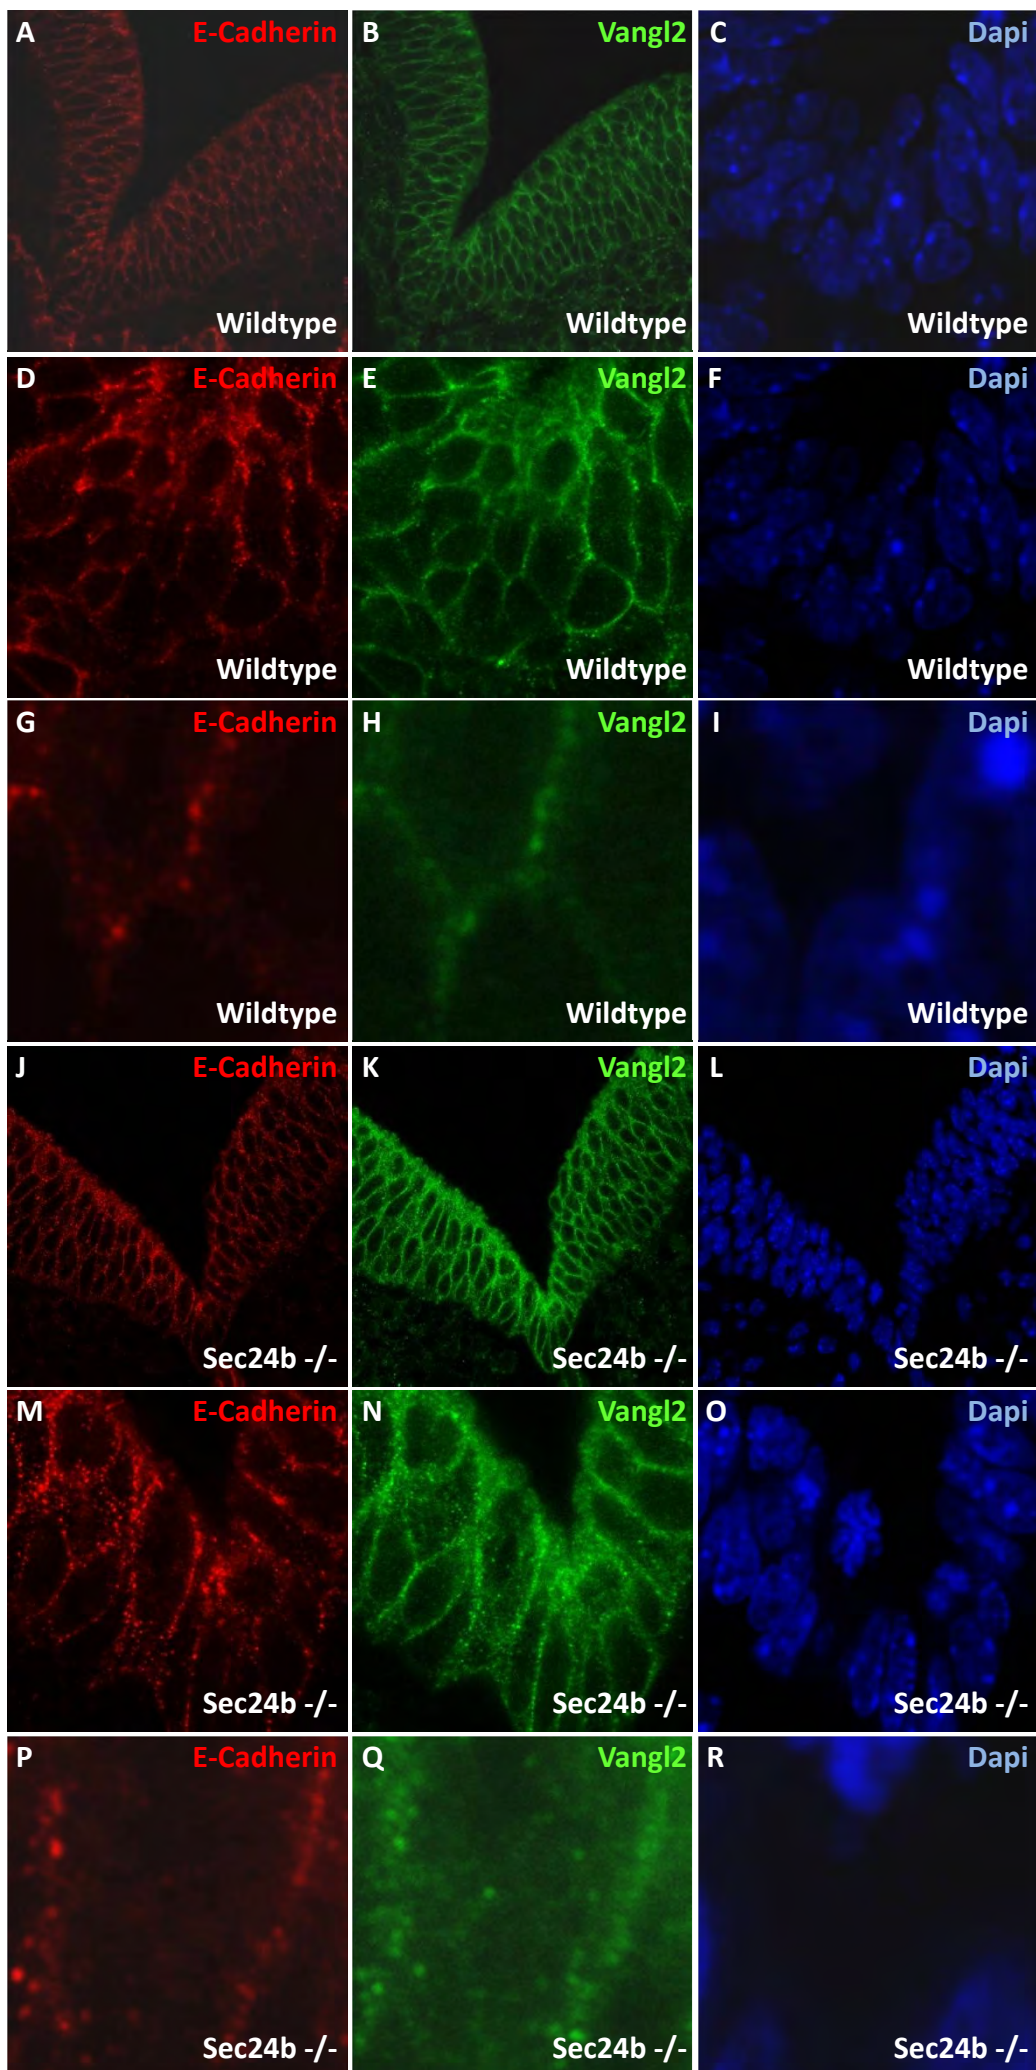

Supplement: dev041434-sup-041434figs5.pdf [file dev041434-sup-041434figs5.pdf]
